# Supplementary material
Source: publisher site journal article supplement (http://dictionary.cambridge.org/assets/bilingual/spanish/pocket-appendix.pdf)
Supplement: Supplementary file 1 [file pocket-appendix.pdf]

Apéndice I

Supplement I

**CORRESPONDENCIA**  
**CORRESPONDENCE****▶ What do I write, when I want to apply for work experience?**

Paul Westney  
6 Wordsworth Road  
Middletown MD8 1NP  
IBERIA  
Apartado de Correos 675  
E-28080 Madrid

Middletown, a 13 de febrero de 2002

**Solicitud de un puesto en prácticas**

Estimados señores:

Con la presente quisiera solicitar un puesto en prácticas en su delegación en Madrid.

Estoy en el penúltimo curso de bachillerato, en el instituto de Middletown. Mis asignaturas principales son el francés y las matemáticas, y desde hace tres años estudio también español. Después del instituto y de realizar el examen de Selectividad correspondiente me gustaría estudiar Ingeniería mecánica.

Antes de empezar con mi último curso de bachillerato me gustaría aprovechar mis vacaciones de verano, del 20 de julio al 30 de agosto, para perfeccionar mis conocimientos de español y para poder conocer al mismo tiempo el mundo laboral.

En el caso de que ustedes acepten mi solicitud, les estaría muy agradecido si pudieran ayudarme a buscar alojamiento.

Les agradezco de antemano todo su interés.

Les saluda muy atentamente,

*Paul Westney*

Anexos: Currículum vitae  
Expedientes escolares compulsados

*Note: Spanish writers put both their name and address at the top left of the page, with the name and address of the other person below and to the left.*

## ► ¿Qué escribo cuando quiero solicitar un puesto en prácticas?

Pza. Padre Silvino, 35  
09001 Burgos

18<sup>th</sup> March 2002

British Airways  
PO Box 12345  
London W12 3PT

**Application for work experience**

Dear Sir or Madam,

This is an application to undertake a period of work experience at your offices in London.

I am at present in Year 12 of the local Grammar School, specializing in English and Mathematics. After my A-levels I intend to study mechanical engineering.

I would like to use the period from July 20<sup>th</sup> to August 30<sup>th</sup> of the summer holidays before Year 13 and my A-level exams to improve my English and experience a little of the world of work.

Should you offer me a place, I would be very grateful if you could help me to find accommodation.

Thank you in advance for taking the trouble to read my application.

Yours sincerely,

*Juan Pérez*

Juan Pérez Montoya

Enclosures: CV  
certified copies of reports

*¡Atención! En una carta inglesa el nombre no suele aparecer en el membrete. La dirección del remitente se pone arriba a la derecha, la dirección del destinatario a la izquierda.*
